# Supplementary material for: Self-Assembly of Palmitic Acid in the Presence of Choline Hydroxide
Source: MDPI journal article supplement (doi:10.3390/molecules28227463), 2023-11-07
Supplement: s1 [file s1]

## Supporting Information

### Self-assembly of palmitic acid in the presence of choline hydroxide

Huifang Xu <sup>1,\*</sup>, Xin Liang <sup>1</sup>, Song Lu <sup>1</sup>, Meihua Gao <sup>2,\*</sup>, Sijia Wang <sup>1</sup>, Yuanyuan Li <sup>1</sup>

<sup>1</sup> College of Pharmacy, Henan University of Chinese Medicine, Zhengzhou 450046, P.R. China

<sup>2</sup> School of Materials and Chemical Engineering, Xuzhou University of Technology, Xuzhou 221018, P.R. China

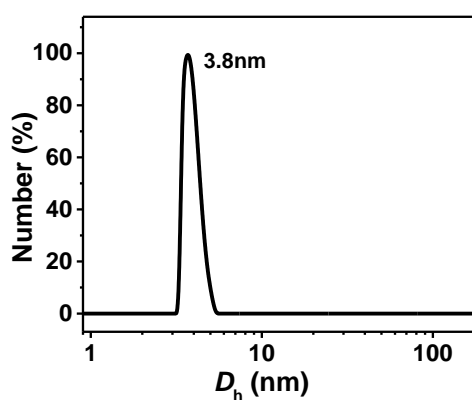

**Figure S1.** Size distribution of the lower phase of the PA/ChOH system at  $R = 0.5$ .

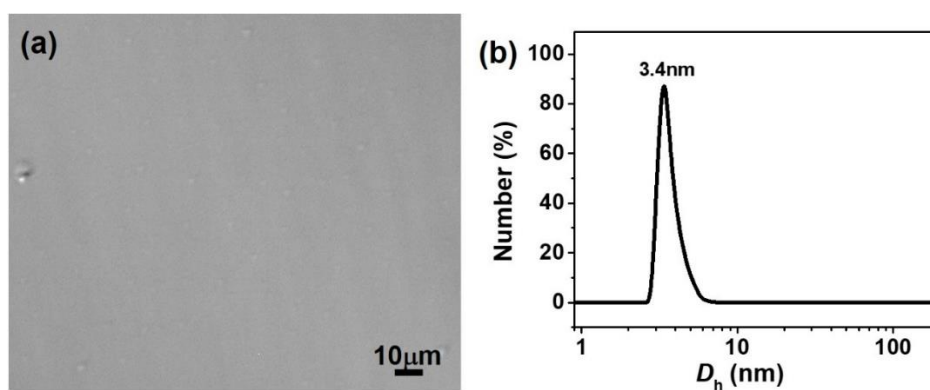

**Figure S2.** (a) Phase contrast image and (b) size distribution of the lower phase of the PA/ChOH system at  $R = 0.6$ .

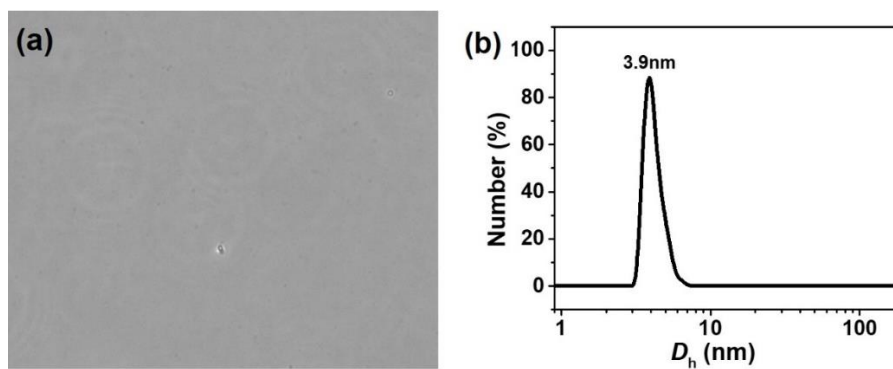

**Figure S3.** (a) Phase contrast image and (b) size distribution of the PA/ChOH system at  $R = 1.0$ .

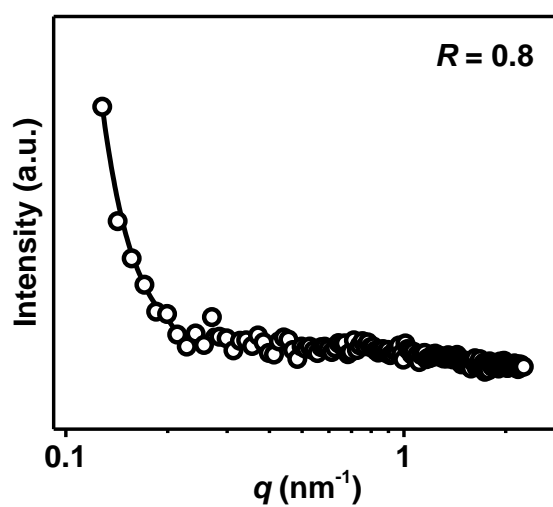

**Figure S4.** SAXS pattern for the PA/ChOH system at  $R = 0.8$  in Region V.

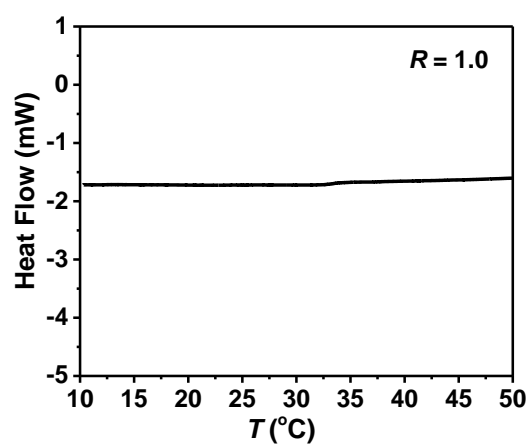

**Figure S5.** DSC curve for the PA/ChOH system at  $R = 1.0$ .

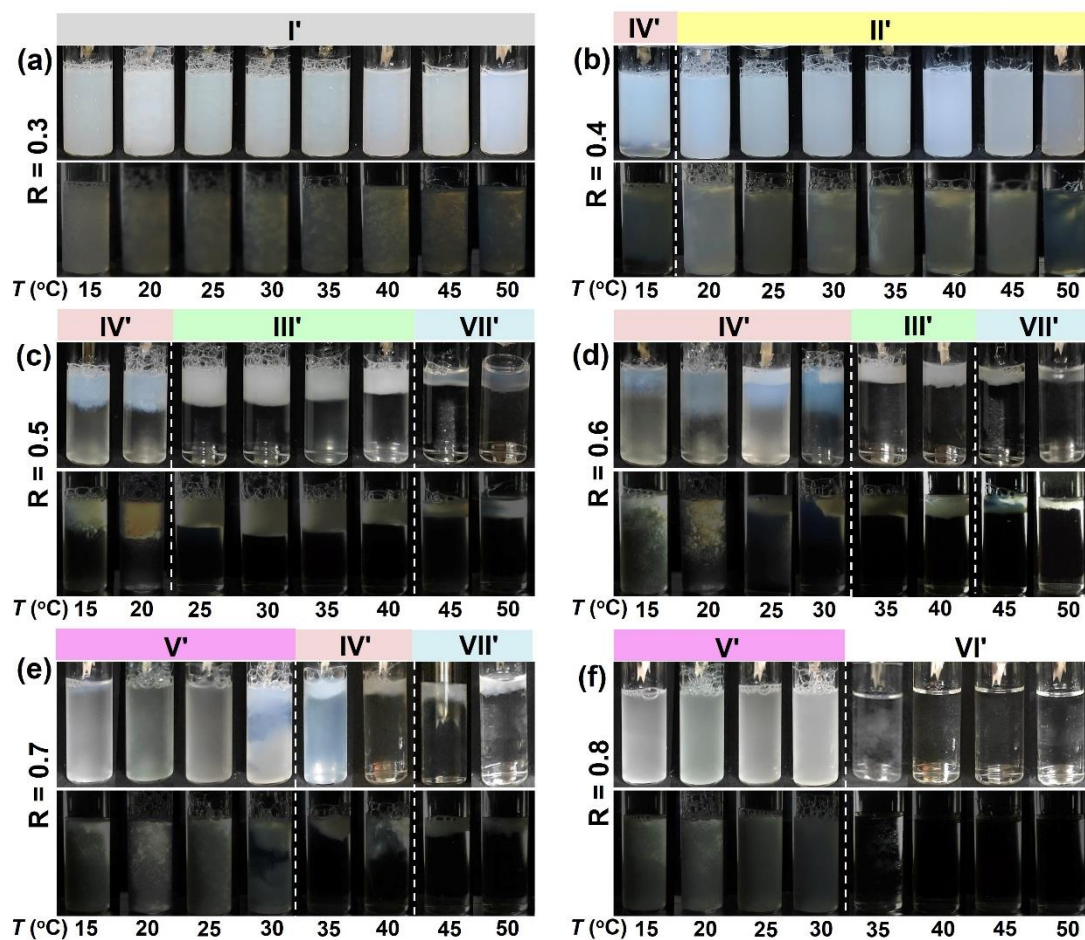

**Figure S6.** Photographs of PA/ChOH systems in water at different  $T$  with (top) and without (down) crossed polarizers. (a)  $R = 0.3$ , (b)  $R = 0.4$ , (c)  $R = 0.5$ , (d)  $R = 0.6$ , (e)  $R = 0.7$ , (f)  $R = 0.8$ .

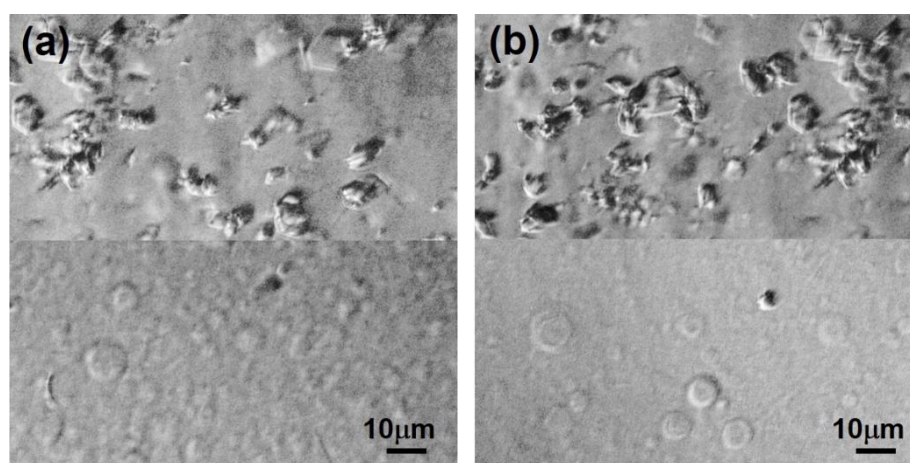

**Figure S7.** Phase contrast images for the PA/ChOH systems at (a)  $R = 0.3, T = 15\text{ °C}$  and (b)  $R = 0.3, T = 50\text{ °C}$ .

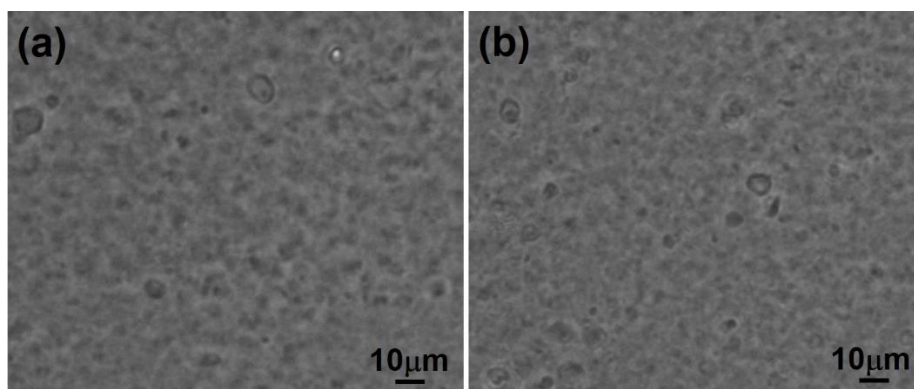

**Figure S8.** Phase contrast images for the PA/ChOH systems at  $R = 0.4$ . (a)  $T = 35\text{ }^{\circ}\text{C}$ ,  
(b)  $T = 50\text{ }^{\circ}\text{C}$ .
